# Supplementary material for: Environmentally relevant levels of four psychoactive compounds vary in their effects on freshwater fish condition: a brain concentration evidence approach
Source: PeerJ. 2020 Jul 9;8:e9356. doi: 10.7717/peerj.9356 (PMC7354837; doi:10.7717/peerj.9356)
Supplement: Supplemental Information 1 [file peerj-08-9356-s001.xlsx]

## Sheet: #LN00122
treatment	metamphetamin brain concentration (ng/g)	fish_ID	trial	K	experimental phase
kontrola	0	1	1	0.79337	exp
kontrola	0	2	1	0.67659	exp
kontrola	0	3	1	0.78610	exp
kontrola	0	4	1	0.77378	exp
kontrola	0	5	1	0.77519	exp
kontrola	0	6	1	0.78588	exp
kontrola	0	7	1	0.73215	exp
kontrola	0	8	1	0.66498	exp
kontrola	0	9	2	0.75845	exp
kontrola	0	10	2	0.68067	exp
kontrola	0	11	2	0.69213	exp
kontrola	0	12	2	0.62859	exp
kontrola	0	13	2	0.78438	exp
kontrola	0	14	2	0.70602	exp
kontrola	0	15	2	0.76208	exp
kontrola	0	16	2	0.75923	exp
kontrola	0	17	3	0.76881	exp
kontrola	0	18	3	0.67767	exp
kontrola	0	19	3	0.72704	exp
kontrola	0	20	3	0.68569	exp
kontrola	0	21	3	0.68571	exp
kontrola	0	22	3	0.60406	exp
kontrola	0	23	3	0.67824	exp
kontrola	0	24	3	0.61796	exp
kontrola	0	25	4	0.67347	exp
kontrola	0	26	4	0.67334	exp
kontrola	0	27	4	0.67334	exp
kontrola	0	28	4	0.61059	exp
kontrola	0	29	4	0.73218	exp
kontrola	0	30	4	0.63542	exp
kontrola	0	31	4	0.69271	exp
kontrola	0	32	4	0.70016	exp
kontrola	0	33	5	0.66015	dep
kontrola	0	34	5	0.59932	dep
kontrola	0	35	5	0.66867	dep
kontrola	0	36	5	0.67525	dep
kontrola	0	37	5	0.62427	dep
kontrola	0	38	5	0.62175	dep
kontrola	0	39	5	0.71178	dep
kontrola	0	40	5	0.68382	dep
expozice	2015-07-01	41	1	0.70602	exp
expozice	2015-02-02	42	1	0.70845	exp
expozice	0.55	43	1	0.73380	exp
expozice	2015-08-01	44	1	0.66409	exp
expozice	2015-02-01	45	1	0.73463	exp
expozice	0.92	46	1	0.71803	exp
expozice	2015-02-02	47	1	0.75920	exp
expozice	0.96	48	1	0.74025	exp
expozice	2015-06-01	49	2	0.73786	exp
expozice	2015-01-01	50	2	0.81492	exp
expozice	3	51	2	0.76484	exp
expozice	2015-03-01	52	2	0.76736	exp
expozice	2015-03-02	53	2	0.71412	exp
expozice	2015-06-01	54	2	0.67263	exp
expozice	2015-07-01	55	2	0.68838	exp
expozice	0.98	57	3	0.72878	exp
expozice	0.86	58	3	0.81366	exp
expozice	2015-02-01	59	3	0.82203	exp
expozice	1	60	3	0.75981	exp
expozice	2015-02-01	61	3	0.87384	exp
expozice	2015-01-01	62	3	0.70269	exp
expozice	2015-01-01	63	3	0.72233	exp
expozice	2015-03-01	64	3	0.65729	exp
expozice	2015-08-01	65	4	0.81275	exp
expozice	2015-05-01	66	4	0.81601	exp
expozice	2015-07-01	67	4	0.82609	exp
expozice	2015-05-01	68	4	0.78924	exp
expozice	2015-06-01	69	4	0.75364	exp
expozice	0.62	70	4	0.82773	exp
expozice	2015-01-03	71	4	0.76483	exp
expozice	2015-07-01	72	4	0.59439	exp
expozice	0.78	73	5	0.80561	dep
expozice	0.62	74	5	0.86427	dep
expozice	0.7	75	5	0.79844	dep
expozice	1	76	5	0.81364	dep
expozice	0.6	77	5	0.85452	dep
expozice	0.54	78	5	0.82057	dep
expozice	2015-01-01	79	5	0.77619	dep
expozice	2015-02-01	80	5	0.79795	dep
