# Supplementary material for: Environmentally relevant levels of four psychoactive compounds vary in their effects on freshwater fish condition: a brain concentration evidence approach
Source: PeerJ. 2020 Jul 9;8:e9356. doi: 10.7717/peerj.9356 (PMC7354837; doi:10.7717/peerj.9356)
Supplement: Supplemental Information 3 [file peerj-08-9356-s003.xlsx]

## Sheet: #LN00117
treatment	sertraline brain concentration (ng/g)	fish_ID	trial	K	experimental phase
kontrola	0	1	1	0.59577	exp
kontrola	0	2	1	0.62188	exp
kontrola	0	3	1	0.61836	exp
kontrola	0	4	1	0.6135	exp
kontrola	0	5	1	0.62636	exp
kontrola	0	6	1	0.61487	exp
kontrola	0	7	1	0.9704	exp
kontrola	0	8	1	0.6927	exp
kontrola	0	9	2	0.58071	exp
kontrola	0	10	2	0.70358	exp
kontrola	0	11	2	0.69	exp
kontrola	0	12	2	0.69981	exp
kontrola	0	13	2	0.59283	exp
kontrola	0	14	2	0.6135	exp
kontrola	0	15	2	0.62981	exp
kontrola	0	16	2	0.6427	exp
kontrola	0	17	3	0.78663	exp
kontrola	0	18	3	0.75349	exp
kontrola	0	19	3	0.68639	exp
kontrola	0	20	3	0.62698	exp
kontrola	0	21	3	0.67591	exp
kontrola	0	22	3	0.75374	exp
kontrola	0	23	3	0.63088	exp
kontrola	0	24	3	0.69124	exp
kontrola	0	25	4	0.69096	exp
kontrola	0	26	4	0.64313	exp
kontrola	0	27	4	0.77671	exp
kontrola	0	28	4	0.76597	exp
kontrola	0	29	4	0.65981	exp
kontrola	0	30	4	0.70008	exp
kontrola	0	31	4	0.70007	exp
kontrola	0	32	4	0.67917	exp
kontrola	0	33	5	0.76698	dep
kontrola	0	34	5	0.59259	dep
kontrola	0	35	5	0.65082	dep
kontrola	0	36	5	0.74822	dep
kontrola	0	37	5	0.65959	dep
kontrola	0	38	5	0.76884	dep
kontrola	0	39	5	0.706	dep
kontrola	0	40	5	0.73668	dep
sertralin	550	41	1	0.6617	exp
sertralin	640	42	1	0.58159	exp
sertralin	530	43	1	0.6239	exp
sertralin	630	44	1	0.491	exp
sertralin	580	45	1	0.72564	exp
sertralin	560	46	1	0.72479	exp
sertralin	550	47	1	0.57384	exp
sertralin	650	48	1	0.49364	exp
sertralin	750	49	2	0.68115	exp
sertralin	870	50	2	0.5314	exp
sertralin	720	51	2	0.63516	exp
sertralin	760	52	2	0.63697	exp
sertralin	1000	53	2	0.68348	exp
sertralin	990	54	2	0.70862	exp
sertralin	750	55	2	0.55468	exp
sertralin	940	56	2	0.6	exp
sertralin	1100	57	3	0.76698	exp
sertralin	1300	58	3	0.44485	exp
sertralin	1100	59	3	0.63516	exp
sertralin	2300	60	3	0.63324	exp
sertralin	2600	61	3	0.58995	exp
sertralin	1100	62	3	0.5147	exp
sertralin	1100	63	3	0.61131	exp
sertralin	750	64	3	0.66687	exp
sertralin	700	65	4	0.6355	exp
sertralin	1100	66	4	0.51303	exp
sertralin	1500	67	4	0.60184	exp
sertralin	940	68	4	0.7272	exp
sertralin	1500	69	4	0.67604	exp
sertralin	2800	70	4	0.63474	exp
sertralin	1800	71	4	0.70508	exp
sertralin	3700	72	4	0.61341	exp
sertralin	15	73	5	0.78836	dep
sertralin	12	74	5	0.55222	dep
sertralin	2015-05-09	75	5	0.75647	dep
sertralin	53	76	5	0.58948	dep
sertralin	44	77	5	0.58436	dep
sertralin	43	78	5	0.62753	dep
sertralin	32	79	5	0.7369	dep
sertralin	46	80	5	0.53	dep
