# Supplementary material for: Environmentally relevant levels of four psychoactive compounds vary in their effects on freshwater fish condition: a brain concentration evidence approach
Source: PeerJ. 2020 Jul 9;8:e9356. doi: 10.7717/peerj.9356 (PMC7354837; doi:10.7717/peerj.9356)
Supplement: Supplemental Information 4 [file peerj-08-9356-s004.xlsx]

## Sheet: #LN00300
treatment	Tramadol brain concentration (ng/g)	fish_ID	trial	K	experimental phase
kontrola	0	1	1	0.68944	exp
kontrola	0	2	1	0.70066	exp
kontrola	0	3	1	0.78199	exp
kontrola	0	4	1	0.74514	exp
kontrola	0	5	1	0.71128	exp
kontrola	0	6	1	0.66905	exp
kontrola	0	7	1	0.72430	exp
kontrola	0	8	1	0.66085	exp
kontrola	0	9	2	0.71208	exp
kontrola	0	10	2	0.68151	exp
kontrola	0	11	2	0.81091	exp
kontrola	0	12	2	0.72780	exp
kontrola	0	13	2	0.72547	exp
kontrola	0	14	2	0.73077	exp
kontrola	0	15	2	0.70018	exp
kontrola	0	16	2	0.67030	exp
kontrola	0	17	3	0.75768	exp
kontrola	0	18	3	0.68616	exp
kontrola	0	19	3	0.76408	exp
kontrola	0	20	3	0.67237	exp
kontrola	0	21	3	0.66458	exp
kontrola	0	22	3	0.66582	exp
kontrola	0	23	3	0.63166	exp
kontrola	0	24	3	0.67056	exp
kontrola	0	25	4	0.55762	exp
kontrola	0	26	4	0.69552	exp
kontrola	0	27	4	0.63570	exp
kontrola	0	28	4	0.68971	exp
kontrola	0	29	4	0.65800	exp
kontrola	0	30	4	0.70306	exp
kontrola	0	31	4	0.66953	exp
kontrola	0	32	4	0.75580	exp
kontrola	0	33	5	0.62670	dep
kontrola	0	34	5	0.74646	dep
kontrola	0	35	5	0.70124	dep
kontrola	0	36	5	0.74646	dep
kontrola	0	37	5	0.85953	dep
kontrola	0	38	5	0.83523	dep
kontrola	0	39	5	0.70906	dep
kontrola	0	40	5	0.74313	dep
expozice	2015-04-01	41	1	0.73016	exp
expozice	2015-05-02	42	1	0.77774	exp
expozice	2015-08-01	43	1	0.73848	exp
expozice	2015-01-02	44	1	0.76967	exp
expozice	2015-03-01	45	1	0.74236	exp
expozice	2015-04-02	46	1	0.69223	exp
expozice	2015-06-01	47	1	0.68800	exp
expozice	2015-03-01	48	1	0.79233	exp
expozice	2015-04-01	49	2	0.74887	exp
expozice	2015-02-01	50	2	0.73426	exp
expozice	2015-01-01	51	2	0.72060	exp
expozice	2015-02-02	52	2	0.71692	exp
expozice	2015-07-01	53	2	0.74046	exp
expozice	2015-04-02	54	2	0.66482	exp
expozice	2015-02-01	55	2	0.64426	exp
expozice	2015-02-01	56	2	0.83066	exp
expozice	2015-03-02	57	3	0.63224	exp
expozice	3	58	3	0.65555	exp
expozice	2015-02-02	59	3	0.77366	exp
expozice	2015-02-01	60	3	0.67106	exp
expozice	2015-01-01	61	3	0.65295	exp
expozice	2015-02-02	62	3	0.98627	exp
expozice	2015-02-01	63	3	0.74227	exp
expozice	2015-04-01	64	3	0.73630	exp
expozice	2015-04-01	65	4	0.77450	exp
expozice	2015-08-01	66	4	0.73272	exp
expozice	2015-04-01	67	4	0.70553	exp
expozice	2015-06-02	68	4	0.76479	exp
expozice	2015-01-01	69	4	0.71275	exp
expozice	2015-08-02	70	4	0.73371	exp
expozice	2015-05-01	71	4	0.61728	exp
expozice	2015-06-02	72	4	0.79462	exp
expozice	0	73	5	0.67831	dep
expozice	0	74	5	0.73893	dep
expozice	0	75	5	0.81629	dep
expozice	0	76	5	0.72627	dep
expozice	0	77	5	0.60137	dep
expozice	0	78	5	0.64273	dep
expozice	0	79	5	0.46749	dep
expozice	0	80	5	0.81207	dep
