# Supplementary material for: Environmentally relevant levels of four psychoactive compounds vary in their effects on freshwater fish condition: a brain concentration evidence approach
Source: PeerJ. 2020 Jul 9;8:e9356. doi: 10.7717/peerj.9356 (PMC7354837; doi:10.7717/peerj.9356)
Supplement: Supplemental Information 5 [file peerj-08-9356-s005.xlsx]

## Sheet: #LN01029
treatment	tank	mortality	experimental phase
kontrola	1	0	exp
kontrola	1	0	exp
kontrola	1	0	exp
kontrola	1	1	exp
kontrola	1	0	exp
kontrola	1	0	exp
kontrola	1	0	exp
kontrola	1	0	exp
kontrola	1	0	exp
kontrola	1	0	exp
kontrola	1	0	exp
kontrola	1	0	exp
kontrola	1	0	exp
kontrola	1	0	exp
kontrola	1	0	exp
kontrola	1	0	exp
kontrola	1	0	exp
kontrola	1	0	exp
kontrola	1	0	exp
kontrola	1	0	exp
kontrola	1	1	exp
kontrola	1	0	exp
kontrola	1	0	exp
kontrola	1	0	exp
kontrola	1	0	exp
kontrola	1	0	exp
kontrola	1	0	exp
kontrola	1	0	exp
kontrola	1	0	exp
kontrola	1	0	exp
kontrola	1	0	exp
kontrola	1	0	exp
kontrola	1	0	exp
kontrola	1	0	exp
kontrola	1	0	exp
kontrola	1	0	exp
kontrola	1	0	exp
kontrola	1	0	exp
kontrola	1	1	exp
kontrola	1	0	exp
kontrola	1	0	exp
kontrola	1	0	exp
kontrola	1	0	dep
kontrola	1	0	dep
kontrola	1	0	dep
kontrola	1	0	dep
kontrola	1	0	dep
kontrola	1	1	dep
kontrola	1	0	dep
kontrola	1	0	dep
kontrola	1	0	dep
kontrola	1	0	dep
kontrola	1	0	dep
kontrola	1	0	dep
kontrola	1	0	dep
kontrola	1	0	dep
kontrola	1	0	dep
kontrola	1	0	dep
kontrola	2	0	exp
kontrola	2	0	exp
kontrola	2	0	exp
kontrola	2	0	exp
kontrola	2	0	exp
kontrola	2	0	exp
kontrola	2	0	exp
kontrola	2	0	exp
kontrola	2	0	exp
kontrola	2	0	exp
kontrola	2	0	exp
kontrola	2	0	exp
kontrola	2	0	exp
kontrola	2	0	exp
kontrola	2	0	exp
kontrola	2	0	exp
kontrola	2	0	exp
kontrola	2	0	exp
kontrola	2	0	exp
kontrola	2	0	exp
kontrola	2	0	exp
kontrola	2	0	exp
kontrola	2	0	exp
kontrola	2	0	exp
kontrola	2	0	exp
kontrola	2	0	exp
kontrola	2	0	exp
kontrola	2	1	exp
kontrola	2	0	exp
kontrola	2	0	exp
kontrola	2	0	exp
kontrola	2	0	exp
kontrola	2	0	exp
kontrola	2	0	exp
kontrola	2	0	exp
kontrola	2	0	exp
kontrola	2	0	exp
kontrola	2	0	exp
kontrola	2	0	exp
kontrola	2	0	exp
kontrola	2	0	exp
kontrola	2	0	exp
kontrola	2	0	dep
kontrola	2	0	dep
kontrola	2	0	dep
kontrola	2	0	dep
kontrola	2	0	dep
kontrola	2	0	dep
kontrola	2	0	dep
kontrola	2	0	dep
kontrola	2	0	dep
kontrola	2	1	dep
kontrola	2	0	dep
kontrola	2	0	dep
kontrola	2	0	dep
kontrola	2	0	dep
kontrola	2	0	dep
kontrola	2	1	dep
exp	3	0	exp
exp	3	0	exp
exp	3	0	exp
exp	3	0	exp
exp	3	0	exp
exp	3	0	exp
exp	3	0	exp
exp	3	0	exp
exp	3	0	exp
exp	3	0	exp
exp	3	0	exp
exp	3	0	exp
exp	3	0	exp
exp	3	1	exp
exp	3	2	exp
exp	3	0	exp
exp	3	0	exp
exp	3	1	exp
exp	3	0	exp
exp	3	0	exp
exp	3	0	exp
exp	3	0	exp
exp	3	0	exp
exp	3	0	exp
exp	3	0	exp
exp	3	0	exp
exp	3	0	exp
exp	3	0	exp
exp	3	0	exp
exp	3	0	exp
exp	3	0	exp
exp	3	0	exp
exp	3	0	exp
exp	3	1	exp
exp	3	0	exp
exp	3	1	exp
exp	3	0	exp
exp	3	0	exp
exp	3	0	exp
exp	3	2	exp
exp	3	0	exp
exp	3	0	exp
exp	3	1	dep
exp	3	0	dep
exp	3	0	dep
exp	3	0	dep
exp	3	0	dep
exp	3	0	dep
exp	3	0	dep
exp	3	0	dep
exp	3	1	dep
exp	3	0	dep
exp	3	0	dep
exp	3	0	dep
exp	3	0	dep
exp	3	0	dep
exp	3	0	dep
exp	3	0	dep
exp	3	0	dep
exp	4	1	exp
exp	4	2	exp
exp	4	0	exp
exp	4	0	exp
exp	4	0	exp
exp	4	1	exp
exp	4	0	exp
exp	4	1	exp
exp	4	0	exp
exp	4	0	exp
exp	4	0	exp
exp	4	0	exp
exp	4	1	exp
exp	4	0	exp
exp	4	1	exp
exp	4	0	exp
exp	4	0	exp
exp	4	0	exp
exp	4	2	exp
exp	4	1	exp
exp	4	0	exp
exp	4	1	exp
exp	4	1	exp
exp	4	1	exp
exp	4	1	exp
exp	4	1	exp
exp	4	0	exp
exp	4	0	exp
exp	4	0	exp
exp	4	0	exp
exp	4	1	exp
exp	4	0	exp
exp	4	0	exp
exp	4	0	exp
exp	4	4	exp
exp	4	2	exp
exp	4	1	exp
exp	4	0	exp
exp	4	1	exp
exp	4	1	exp
exp	4	0	exp
exp	4	0	exp
exp	4	0	dep
exp	4	1	dep
exp	4	2	dep
exp	4	0	dep
exp	4	0	dep
exp	4	1	dep
exp	4	0	dep
exp	4	0	dep
exp	4	0	dep
exp	4	0	dep
exp	4	0	dep
exp	4	0	dep
exp	4	0	dep
exp	4	0	dep
exp	4	1	dep
exp	4	1	dep
exp	4	1	dep
