# Supplementary material for: Environmentally relevant levels of four psychoactive compounds vary in their effects on freshwater fish condition: a brain concentration evidence approach
Source: PeerJ. 2020 Jul 9;8:e9356. doi: 10.7717/peerj.9356 (PMC7354837; doi:10.7717/peerj.9356)
Supplement: Supplemental Information 6 [file peerj-08-9356-s006.xlsx]

## Sheet: #LN01027
treatment	tank	trial	food ingestion	experimental phase
kontrola	1	1	8	exp
kontrola	1	2	9	exp
kontrola	1	3	11	exp
kontrola	1	4	12	exp
kontrola	1	5	9	exp
kontrola	1	6	9	exp
kontrola	1	7	12	exp
kontrola	1	8	9	exp
kontrola	1	9	11	exp
kontrola	1	10	14	dep
kontrola	1	11	15	dep
kontrola	1	12	12	dep
kontrola	1	13	14	dep
kontrola	1	14	11	dep
kontrola	1	15	14	dep
kontrola	2	1	9	exp
kontrola	2	2	9	exp
kontrola	2	3	8	exp
kontrola	2	4	6	exp
kontrola	2	5	7	exp
kontrola	2	6	7	exp
kontrola	2	7	9	exp
kontrola	2	8	9	exp
kontrola	2	9	7	exp
kontrola	2	10	12	dep
kontrola	2	11	13	dep
kontrola	2	12	12	dep
kontrola	2	13	10	dep
kontrola	2	14	13	dep
kontrola	2	15	12	dep
sert	3	1	14	exp
sert	3	2	15	exp
sert	3	3	15	exp
sert	3	4	15	exp
sert	3	5	15	exp
sert	3	6	14	exp
sert	3	7	15	exp
sert	3	8	15	exp
sert	3	9	15	exp
sert	3	10	15	dep
sert	3	11	9	dep
sert	3	12	9	dep
sert	3	13	9	dep
sert	3	14	7	dep
sert	3	15	8	dep
sert	4	1	15	exp
sert	4	2	15	exp
sert	4	3	15	exp
sert	4	4	15	exp
sert	4	5	15	exp
sert	4	6	15	exp
sert	4	7	15	exp
sert	4	8	15	exp
sert	4	9	15	exp
sert	4	10	15	dep
sert	4	11	15	dep
sert	4	12	15	dep
sert	4	13	15	dep
sert	4	14	15	dep
sert	4	15	15	dep
